# Supplementary material for: The Influence of Female Directors on Product Recall Decisions
Source: Atypon-hosted journal article supplement (doi:10.1287/msom.2019.0841), 2020-03-26
Supplement: msom.2019.0841.sm1.pdf [file msom.2019.0841.sm1.pdf]

## Online Appendix

**Table A1. Robustness Check. Level of Analysis**

|                                                | 1                              | 2                                           | 3                            | 4                            | 5                                                  | 6                            | 7                            |
|------------------------------------------------|--------------------------------|---------------------------------------------|------------------------------|------------------------------|----------------------------------------------------|------------------------------|------------------------------|
|                                                | Logit Fixed Effect             | Negative Binomial Fixed Effect Recall Count |                              |                              | Ordinary Least Squares Fixed Effect Time-to-Recall |                              |                              |
|                                                | VP Quality Female <sup>a</sup> | Class 1 Recalls <sup>b</sup>                | Class 2 Recalls <sup>c</sup> | Class 3 Recalls <sup>d</sup> | Class 1 Recalls <sup>b</sup>                       | Class 2 Recalls <sup>c</sup> | Class 3 Recalls <sup>d</sup> |
| Ln_sales                                       | -0.04<br>(1.17)                | 0.21<br>(0.35)                              | 0.12<br>(0.09)               | 0.10<br>(0.11)               | 0.49*<br>(0.24)                                    | 0.04<br>(0.19)               | 0.08<br>(0.16)               |
| Ln products                                    | 0.42<br>(0.39)                 | 0.06<br>(0.16)                              | -0.07<br>(0.05)              | 0.19+<br>(0.10)              | 0.11<br>(0.13)                                     | -0.23*<br>(0.10)             | 0.17<br>(0.12)               |
| R&D intensity                                  | 0.01<br>(0.01)                 | -5.09<br>(8.63)                             | -3.76*<br>(1.74)             | 0.26<br>(1.61)               | -1.07<br>(0.72)                                    | 0.03<br>(0.17)               | -0.61<br>(1.28)              |
| Recall history                                 | 0.03<br>(0.11)                 | -0.00<br>(0.05)                             | 0.10***<br>(0.02)            | 0.05+<br>(0.03)              | 0.05<br>(0.07)                                     | 0.58**<br>(0.18)             | 0.10*<br>(0.05)              |
| Tenure                                         | -0.30<br>(0.40)                | -0.01<br>(0.20)                             | 0.08<br>(0.06)               | 0.17<br>(0.11)               | 0.05<br>(0.12)                                     | 0.08<br>(0.10)               | 0.20+<br>(0.12)              |
| Board independence                             | -0.55<br>(0.34)                | 0.07<br>(0.17)                              | -0.03<br>(0.06)              | -0.07<br>(0.09)              | 0.15<br>(0.11)                                     | 0.08<br>(0.10)               | -0.01<br>(0.11)              |
| CEO-chair separation                           | 0.20<br>(0.23)                 | 0.02<br>(0.14)                              | 0.06<br>(0.04)               | -0.02<br>(0.08)              | 0.13+<br>(0.07)                                    | 0.05<br>(0.06)               | -0.09<br>(0.08)              |
| FBR                                            | 0.61+<br>(0.32)                | -0.12<br>(0.18)                             | 0.07<br>(0.06)               | 0.27*<br>(0.11)              | -0.22*<br>(0.09)                                   | 0.20+<br>(0.10)              | 0.13<br>(0.10)               |
| VP Quality Female                              |                                | 0.41<br>(0.29)                              | -0.12<br>(0.10)              | -0.17<br>(0.18)              | 0.07<br>(0.08)                                     | -0.14<br>(0.19)              | -0.26<br>(0.27)              |
| Constant                                       | -5.51**<br>(2.73)              | 1.36<br>(4.78)                              | 2.73**<br>(1.04)             | -2.22+<br>(1.16)             | 0.01<br>(0.01)                                     | 2.26<br>(1.76)               | -0.64<br>(1.56)              |
| Observations                                   | 835                            | 401                                         | 817                          | 599                          | 401                                                | 817                          | 599                          |
| Wald Chi <sup>2</sup> or Pseudo r <sup>2</sup> | 18.74                          | 42.68                                       | 165.70                       | 80.94                        | 0.13                                               | 0.16                         | 0.12                         |

Standard errors in parentheses, + p<0.10, \*p<0.05, \*\*p<0.01, \*\*\*p<0.001. Year indicator variables included not shown.

<sup>a</sup>Firm fixed effects included in this model as indicator variables only for those firms that experienced a change in the VP of Quality Female measure in the 12-years of the study to ensure all 835 observations are included. This ensures that observations are not dropped if the firm never had a VP of quality that was female.

<sup>b</sup>Fixed effects regressions drop observations in which the dependent variable does not change across the panel for a given firm; 434 observations dropped because of firms with no class 1 recalls in time of panel (835-434=401).

<sup>c</sup>18 observations dropped because of firms with no class 2 recalls in time of panel (835-18=817).

<sup>d</sup>236 observations dropped because of firms with no class 3 recalls in time of panel (835-236=599).

**Table A2. Robustness Check. Alternative Female Director Measures. Female Director Observation Frequency**

|                                      | Number of Females Directors |       |       |       |      |      | Total  |
|--------------------------------------|-----------------------------|-------|-------|-------|------|------|--------|
|                                      | 0                           | 1     | 2     | 3     | 4    | 5    |        |
| Frequency of firm-year observations  | 158                         | 311   | 249   | 96    | 17   | 4    | 835    |
| Percentage of firm-year observations | 19.0%                       | 37.2% | 29.8% | 11.5% | 2.0% | 0.5% | 100.0% |

Note: Sum of non-zero female director observations is 677=311+249+96+17+4

**Table A3. Robustness Check. Alternative Female Director Measures.  
Female Director Dichotomous**

|                                                | 1                                              | 2                               | 3                               | 4                                                     | 5                               | 6                               |
|------------------------------------------------|------------------------------------------------|---------------------------------|---------------------------------|-------------------------------------------------------|---------------------------------|---------------------------------|
|                                                | Negative Binomial Fixed Effect<br>Recall Count |                                 |                                 | Ordinary Least Squares Fixed Effect<br>Time-to-Recall |                                 |                                 |
|                                                | Class 1<br>Recalls <sup>a</sup>                | Class 2<br>Recalls <sup>b</sup> | Class 3<br>Recalls <sup>c</sup> | Class 1<br>Recalls <sup>a</sup>                       | Class 2<br>Recalls <sup>b</sup> | Class 3<br>Recalls <sup>c</sup> |
| Ln_sales                                       | 0.32<br>(0.35)                                 | -0.01<br>(0.17)                 | 0.10<br>(0.11)                  | -0.00<br>(0.03)                                       | 0.07<br>(0.14)                  | 0.09<br>(0.15)                  |
| Ln products                                    | 0.06<br>(0.16)                                 | -0.11<br>(0.11)                 | 0.17+<br>(0.10)                 | -0.04<br>(0.03)                                       | -0.25*<br>(0.11)                | 0.16<br>(0.12)                  |
| R&D intensity                                  | -7.71<br>(7.99)                                | 0.01<br>(0.01)                  | 0.21<br>(1.65)                  | 0.01<br>(0.05)                                        | 0.03<br>(0.15)                  | -0.01<br>(0.16)                 |
| Recall history                                 | 0.02<br>(0.05)                                 | 0.14**<br>(0.05)                | 0.05*<br>(0.03)                 | 0.06*<br>(0.03)                                       | 0.21***<br>(0.06)               | 0.10*<br>(0.05)                 |
| Tenure                                         | -0.01<br>(0.20)                                | 0.07<br>(0.11)                  | 0.12<br>(0.11)                  | -0.08<br>(0.05)                                       | 0.06<br>(0.09)                  | 0.18<br>(0.13)                  |
| Board independence                             | -0.03<br>(0.16)                                | -0.02<br>(0.10)                 | -0.04<br>(0.09)                 | 0.04<br>(0.06)                                        | 0.09<br>(0.09)                  | 0.02<br>(0.11)                  |
| CEO-chair separation                           | 0.06<br>(0.14)                                 | 0.07<br>(0.08)                  | -0.03<br>(0.08)                 | 0.02<br>(0.05)                                        | 0.06<br>(0.06)                  | -0.09<br>(0.08)                 |
| Board Size                                     | 0.03<br>(0.08)                                 | 0.01<br>(0.05)                  | -0.00<br>(0.05)                 | -0.05*<br>(0.02)                                      | 0.02<br>(0.04)                  | -0.01<br>(0.05)                 |
| Female Dichotomous                             | 1.40<br>(0.85)                                 | 0.48+<br>(0.26)                 | 0.79*<br>(0.39)                 | -0.43**<br>(0.13)                                     | 0.19<br>(0.22)                  | 0.42<br>(0.27)                  |
| Constant                                       | 0.63<br>(3.69)                                 | 0.01<br>(1.14)                  | -2.74*<br>(1.17)                | 0.45<br>(0.32)                                        | 2.02<br>(1.34)                  | -1.14<br>(1.51)                 |
| Observations                                   | 401                                            | 817                             | 599                             | 401                                                   | 817                             | 599                             |
| Wald Chi <sup>2</sup> or Pseudo r <sup>2</sup> | 41.23                                          | 172.98                          | 78.16                           | 0.13                                                  | 0.09                            | 0.07                            |

Standard errors in parentheses, + p<0.10, \*p<0.05, \*\*p<0.01, \*\*\*p<0.001. Year indicator variables included not shown.

<sup>a</sup> Fixed effects regressions drop observations in which the dependent variable does not change across the panel for a given firm; 434 observations dropped because of firms with no class 1 recalls in time of panel (835-434=401).

<sup>b</sup> 18 observations dropped because of firms with no class 2 recalls in time of panel (835-18=817).

<sup>c</sup> 236 observations dropped because of firms with no class 3 recalls in time of panel (835-236=599).

**Table A4. Robustness Check. Alternative Female Director Measures.  
Number of Female Directors**

|                                                | 1                                              | 2                               | 3                               | 4                                                     | 5                               | 6                               |
|------------------------------------------------|------------------------------------------------|---------------------------------|---------------------------------|-------------------------------------------------------|---------------------------------|---------------------------------|
|                                                | Negative Binomial Fixed Effect<br>Recall Count |                                 |                                 | Ordinary Least Squares Fixed Effect<br>Time-to-Recall |                                 |                                 |
|                                                | Class 1<br>Recalls <sup>a</sup>                | Class 2<br>Recalls <sup>b</sup> | Class 3<br>Recalls <sup>c</sup> | Class 1<br>Recalls <sup>a</sup>                       | Class 2<br>Recalls <sup>b</sup> | Class 3<br>Recalls <sup>c</sup> |
| Ln_sales                                       | 0.26<br>(0.32)                                 | -0.06<br>(0.20)                 | 0.08<br>(0.11)                  | 0.25*<br>(0.12)                                       | 0.05<br>(0.14)                  | 0.09<br>(0.15)                  |
| Ln products                                    | 0.07<br>(0.16)                                 | -0.07<br>(0.13)                 | 0.17+<br>(0.10)                 | 0.01<br>(0.09)                                        | -0.25*<br>(0.11)                | 0.16<br>(0.12)                  |
| R&D intensity                                  | -4.12<br>(7.07)                                | 0.01<br>(0.01)                  | 0.07<br>(1.68)                  | 0.00<br>(0.10)                                        | 0.02<br>(0.15)                  | -0.00<br>(0.16)                 |
| Recall history                                 | 0.02<br>(0.05)                                 | 0.04<br>(0.06)                  | 0.05+<br>(0.03)                 | 0.11<br>(0.07)                                        | 0.21***<br>(0.06)               | 0.11*<br>(0.05)                 |
| Tenure                                         | -0.07<br>(0.21)                                | 0.06<br>(0.13)                  | 0.16<br>(0.11)                  | 0.09<br>(0.10)                                        | 0.07<br>(0.10)                  | 0.18<br>(0.13)                  |
| Board independence                             | -0.06<br>(0.17)                                | 0.01<br>(0.12)                  | -0.05<br>(0.09)                 | -0.05<br>(0.07)                                       | 0.08<br>(0.09)                  | 0.01<br>(0.11)                  |
| CEO-chair separation                           | 0.06<br>(0.14)                                 | 0.03<br>(0.09)                  | -0.03<br>(0.08)                 | 0.01<br>(0.06)                                        | 0.06<br>(0.06)                  | -0.09<br>(0.08)                 |
| Board Size                                     | 0.04<br>(0.08)                                 | 0.00<br>(0.06)                  | -0.02<br>(0.05)                 | -0.03<br>(0.04)                                       | 0.01<br>(0.04)                  | -0.01<br>(0.05)                 |
| One female                                     | 1.26<br>(0.79)                                 | 0.29<br>(0.31)                  | 0.81*<br>(0.40)                 | -0.26<br>(0.18)                                       | 0.19<br>(0.22)                  | 0.43<br>(0.28)                  |
| Two females                                    | 1.02<br>(0.86)                                 | 0.43<br>(0.37)                  | 1.09*<br>(0.44)                 | -0.60*<br>(0.24)                                      | 0.29<br>(0.27)                  | 0.43<br>(0.33)                  |
| Three or more females                          | 0.59<br>(0.98)                                 | 0.55<br>(0.46)                  | 1.25*<br>(0.49)                 | -0.97***<br>(0.37)                                    | 0.61+<br>(0.33)                 | 0.53<br>(0.40)                  |
| Constant                                       | -1.10<br>(3.22)                                | -0.13<br>(1.29)                 | -2.65*<br>(1.24)                | -1.01<br>(0.89)                                       | 1.90<br>(1.37)                  | -1.08<br>(1.55)                 |
| Observations                                   | 401                                            | 817                             | 599                             | 401                                                   | 817                             | 599                             |
| Wald Chi <sup>2</sup> or Pseudo r <sup>2</sup> | 42.73                                          | 178.60                          | 82.87                           | 0.13                                                  | 0.16                            | 0.13                            |

Standard errors in parentheses, + p<0.10, \*p<0.05, \*\*p<0.01, \*\*\*p<0.001. Year indicator variables included not shown.

<sup>a</sup> Fixed effects regressions drop observations in which the dependent variable does not change across the panel for a given firm; 434 observations dropped because of firms with no class 1 recalls in time of panel (835-434=401).

<sup>b</sup> 18 observations dropped because of firms with no class 2 recalls in time of panel (835-18=817).

<sup>c</sup> 236 observations dropped because of firms with no class 3 recalls in time of panel (835-236=599).
